# Supplementary material for: The intriguing question of anionic redox in high-energy density cathodes for Li-ion batteries
Source: Royal Society of Chemistry journal article supplement (doi:10.1039/c5ee03048j), 2015-10-30
Supplement: c5ee03048j1.pdf [file c5ee03048j1.pdf]

## Supplementary information for: The Intriguing Question of Anionic Redox in High-Energy Density Cathodes for Li-ion Batteries

M. Saubanère<sup>1,3</sup>, E. McCalla<sup>1,3</sup>, J.-M. Tarascon<sup>1,3</sup>, M.-L. Doublet<sup>2,3</sup>

<sup>1</sup> *Collège de France, Laboratoire de Chimie du Solide et Energie,  
11, Rue Marcelin Berthelot, 75005 Paris, France*

<sup>2</sup> *Institut Charles Gerhardt, CNRS - Université Montpellier 2,  
Place Eugène Bataillon, 34095 Montpellier, France.*

<sup>3</sup> *Réseau Français sur le Stockage Electrochimique  
de l'Energie - RS2E FR3459, Amiens, France*

(Dated: October 6, 2015)

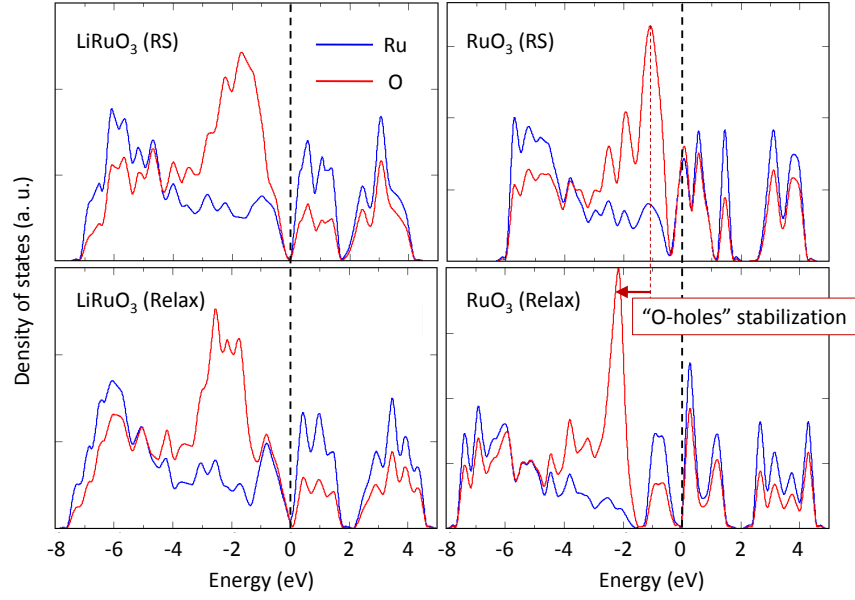

**Fig. SI1** Density of states (DOS) of the  $\text{LiRuO}_3$  and  $\text{RuO}_3$  structures, as obtained from DFT+U calculations in the rigid structure model (RS) and after full structural relaxation, showing that the O-band is significantly shifted down to lower energy at  $\text{RuO}_3$  compared to the DOS computed within the rigid structure approach, due to the stabilization of the oxygen network through the formation of short O-O dimers.

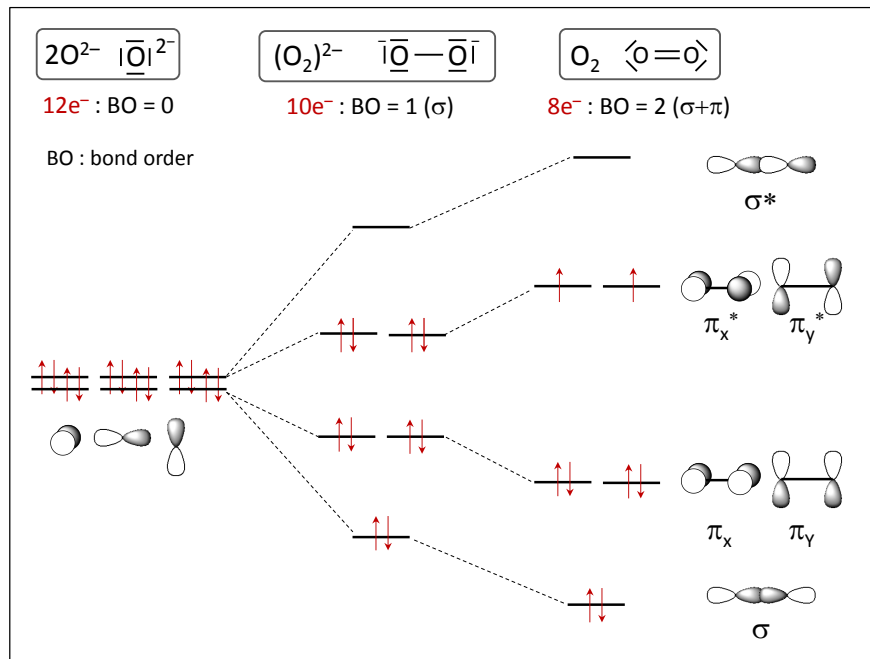

**Fig. SI2:** Orbital interaction diagram for the formation of the  $(\text{O}_2)^{2-}$  peroxide and  $\text{O}_2$  gas from the progressive oxidation of two non interacting  $\text{O}^{2-}$  anions. The shortening of the O-O distance leads to the splitting of the  $\text{O}^{2-}(2p)$ -orbitals into two  $\sigma$ - and four  $\pi$ -type molecular orbitals. The number of electrons for each species is indicated in red in addition to the total bond order. Bond orders correspond to  $\frac{1}{2}(N_e^B - N_e^{AB})$  where  $N_e$  and  $N_e^{AB}$  refer to the number of bonding and antibonding electrons, respectively.

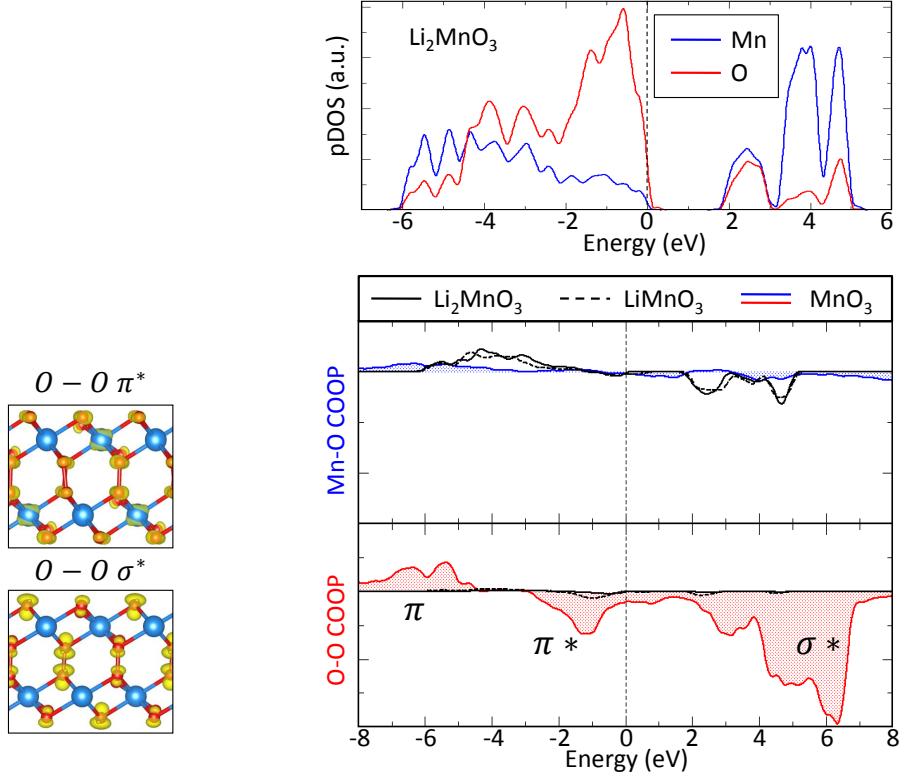

**Fig. SI3:** Density of States (DOS) of the fully relaxed  $\text{Li}_2\text{MnO}_3$  structure showing the predominant contribution of the oxygen levels at the Fermi level and Crystal Orbital Overlap populations (COOP) computed for the Mn-O and O-O bonds in the fully relaxed  $\text{Li}_{2-x}\text{MnO}_3$  phases at  $x = 0, 1$  and  $2$ . The formation of strongly oxidized O-O dimers is identified at  $x = 2$  by the emptying of all the  $\sigma^*$  and part of the  $\pi^*$  O-O electronic levels which corresponds to  $(\text{O}_2)^{n-}$  with  $n \leq 2$  from the  $\text{O}_2$  molecular diagram of Figure SI2. The negligible Mn-O COOPs obtained for  $\text{MnO}_3$  compared to  $\text{LiMnO}_3$  and  $\text{Li}_2\text{MnO}_3$  is compatible with the decrease of Mn-O bond covalency upon delithiation and agrees with the O-O dimer decoordination from the metallic network when 2Li are removed. The orbitals associated with the emptied  $\sigma^*$  and  $\pi^*$  electronic levels are represented on the left part of the Figure.

**Table S1:** Computed averaged Bader atomic net populations in  $\text{Li}_{2-x}\text{MO}_3$  ( $\text{M} = \text{Ru}, \text{Mn}$ ) as a function of the Lithium content  $x = 0, 1, 2$ . The values in parenthesis give the percentage of electron loss per atom in the rigid band model RB (removal of electrons) and in the fully relaxed  $\text{Li}_{2-x}\text{MO}_3$  structures (Relaxed).

|                              |     | RB         |            | Relaxed     |            |
|------------------------------|-----|------------|------------|-------------|------------|
| $\text{Li}_{2-x}\text{MO}_3$ | $x$ | M          | O          | M           | O          |
| $\text{M} = \text{Ru}(4d)$   | 0   | 6.53       | 7.06       | 6.53        | 7.06       |
|                              | 1   | 6.19 (37%) | 6.86 (21%) | 6.15 (46%)  | 6.91 (18%) |
|                              | 2   | 5.90 (25%) | 6.64 (25%) | 6.08 (7%)   | 6.63 (31%) |
| $\text{M} = \text{Mn}(3d)$   | 0   | 5.26       | 7.15       | 5.26        | 7.15       |
|                              | 1   | 5.15 (10%) | 6.86 (30%) | 5.22 (4%)   | 6.88 (32%) |
|                              | 2   | 5.10 (13%) | 6.59 (29%) | 5.38 (-17%) | 6.54 (39%) |

The results listed in the table show the cumulative cationic and anionic oxidation of  $\text{Li}_{2-x}\text{RuO}_3$  from  $x = 0$  to 1 and  $x = 1$  to 2, respectively. The removal of 1Li shows a greater oxidation of Ru compared to O while the second Li-removal shows a greater oxidation of O. The comparison between the RB and fully relaxed results for  $\text{Li}_{2-x}\text{RuO}_3$  clearly shows that a  $\text{M} \rightarrow \text{O}$  charge transfer occurs when the  $\text{LiRuO}_3$  structure is relaxed (greater oxidation of Ru after structural relaxation) while a  $\text{O} \rightarrow \text{M}$  charge transfer occurs when the  $\text{RuO}_3$  structure is relaxed (greater oxidation of O after structural relaxation). This highlights the partial reduction of the transition metal when the reductive coupling mechanism takes place. For the  $\text{Li}_{2-x}\text{MnO}_3$  electrode, the removal of two consecutive Li confirms the predominant anionic redox: the oxidation of O is much larger than for the Ru-based material whatever is  $x$  and systematically increased after structural relaxation, in agreement with the lack of  $\text{Mn}(3d)/\text{O}(2p)$  overlap. The  $\text{MnO}_3$  phase associated with the formation of strongly oxidized  $(\text{O}_2)^{n-}$  (Relaxed) clearly shows the reduction of the Mn ions (negative charge transfer). Note that the Mn Bader net population obtained for  $\text{MnO}_3$  (5.38) is very close to that obtained in the layered  $\text{LiMnO}_2$  phase (5.45) in which Mn oxidation state is +3.
